# Supplementary material for: XPS as a probe for the bonding nature in metal acetates
Source: Royal Society of Chemistry journal article supplement (doi:10.1039/d2nj01905a), 2022-01-01
Supplement: d2nj01905a1.pdf [file d2nj01905a1.pdf]

## XPS as Sensor for the Bonding Nature in Metal Acetates

O. Pérez<sup>1</sup>, O. F. Odio<sup>2,\*</sup>, E. Reguera<sup>1,\*</sup>

1) Instituto Politécnico Nacional, Centro de Investigación en Ciencia Aplicada y Tecnología Avanzada, Unidad Legaria, Ciudad México, México.

2) CONACyT- Instituto Politécnico Nacional, Centro de Investigación en Ciencia Aplicada y Tecnología Avanzada, Unidad Legaria, Ciudad México, México.

### A) XPS data for the measured metal acetates

**Table S1.** Binding energy values for the –CH<sub>3</sub> group for the measured metal acetates.

| Metal acetate | E <sub>B</sub> [C 1s] <sub>-CH<sub>3</sub></sub> (eV) |
|---------------|-------------------------------------------------------|
| Li            | 285.23                                                |
| Na            | 285.30                                                |
| Mg            | 285.21                                                |
| K             | 285.18                                                |
| Mn            | 285.17                                                |
| Fe            | 285.28                                                |
| Co            | 285.37                                                |
| Ni            | 285.43                                                |
| Cu            | 285.35                                                |
| Zn            | 285.17                                                |
| Ag            | 285.20                                                |
| Cd            | 285.27                                                |
| Hg            | 285.29                                                |
| Pb            | 285.29                                                |

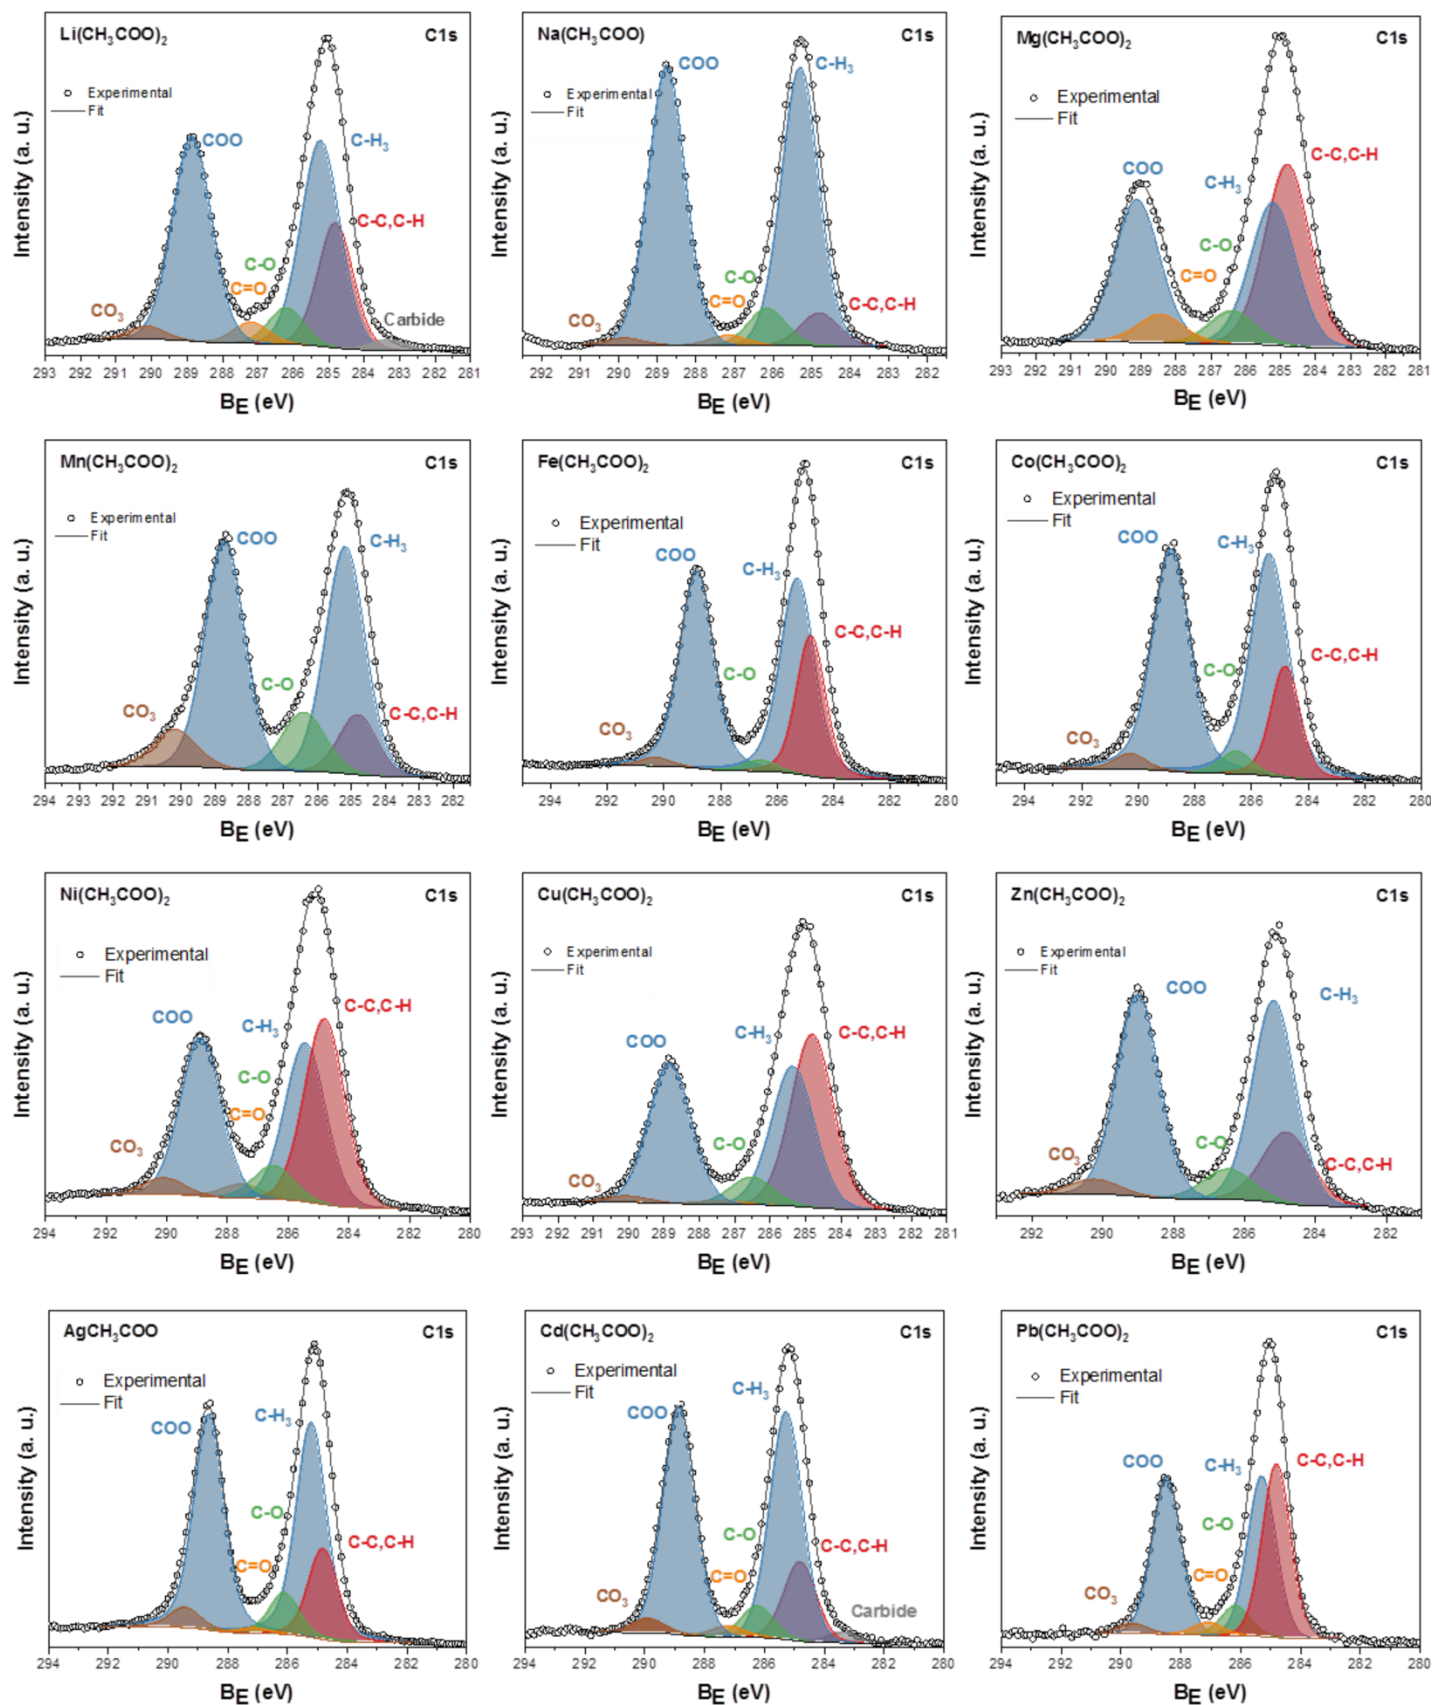

**Figure S1.** Curve fitting for C 1s spectra of the studied metal acetates. Signals pertaining to model compounds are shown in blue while those related to adventitious contamination are shown in other colors

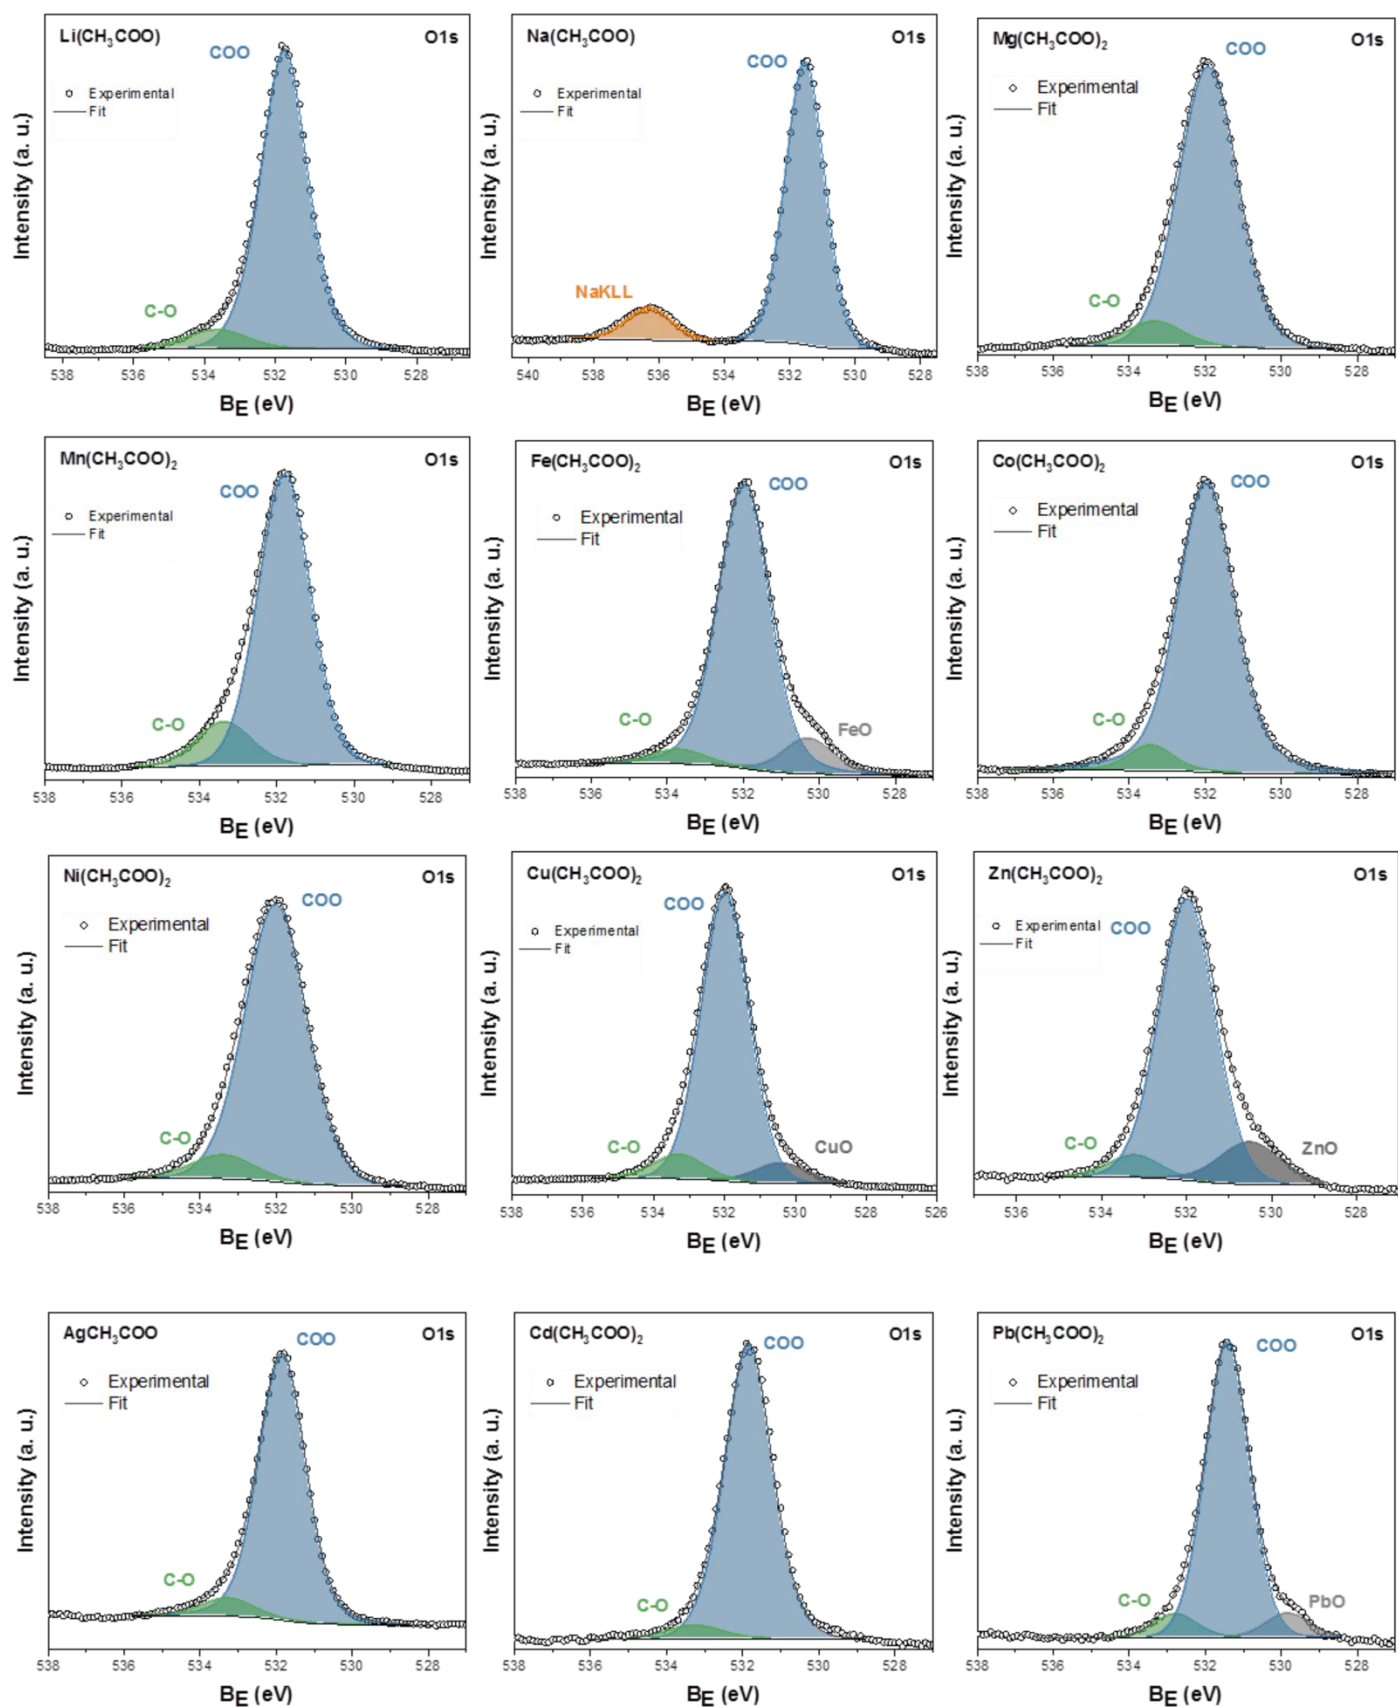

**Figure S2.** Curve fitting for O 1s spectra of the studied metal acetates. Signals pertaining to model compounds are shown in blue while those related to adventitious contamination or acetate decomposition are shown in other colors

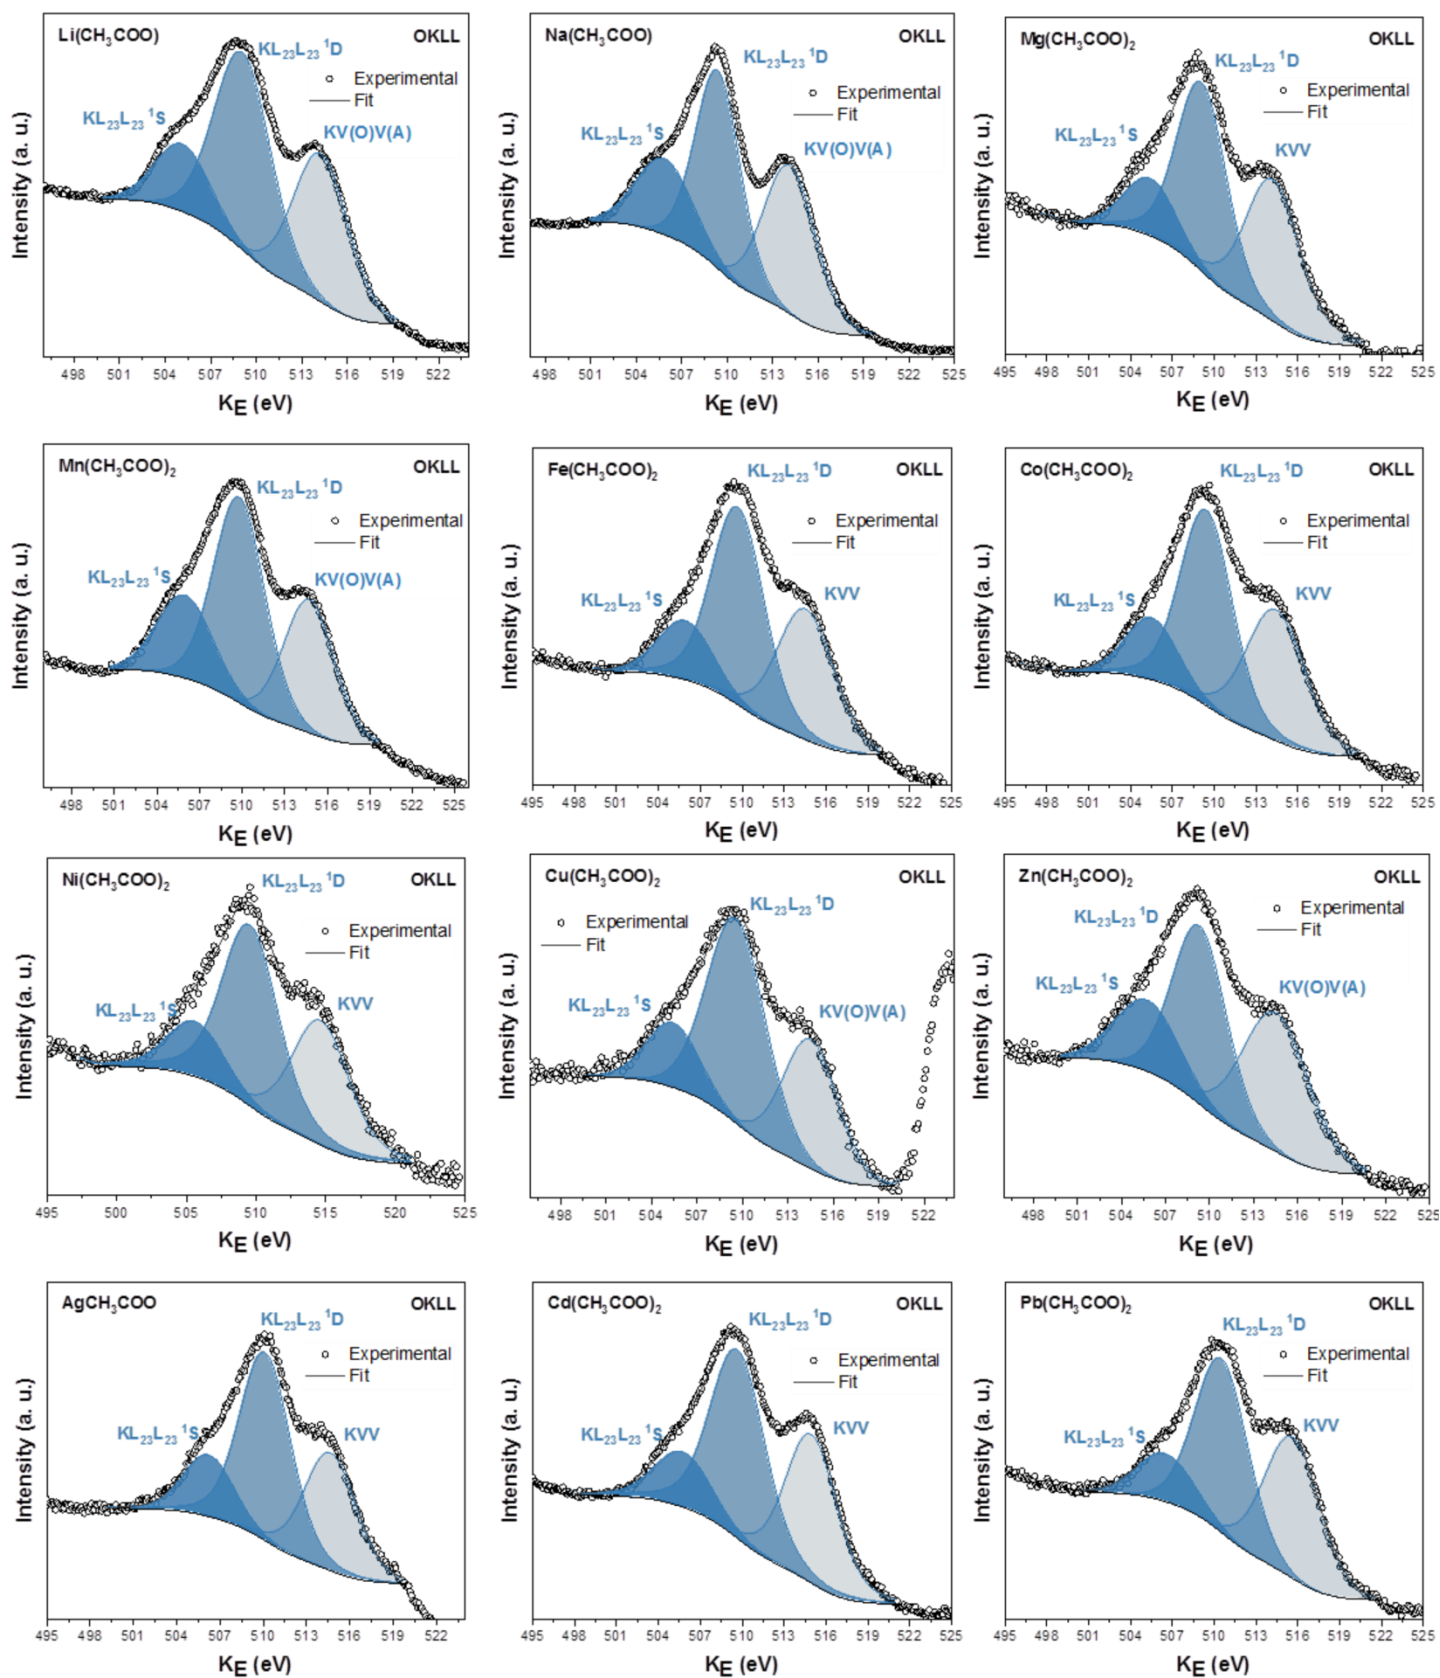

**Figure S3.** Curve fitting for the O KLL Auger region of the studied metal acetates

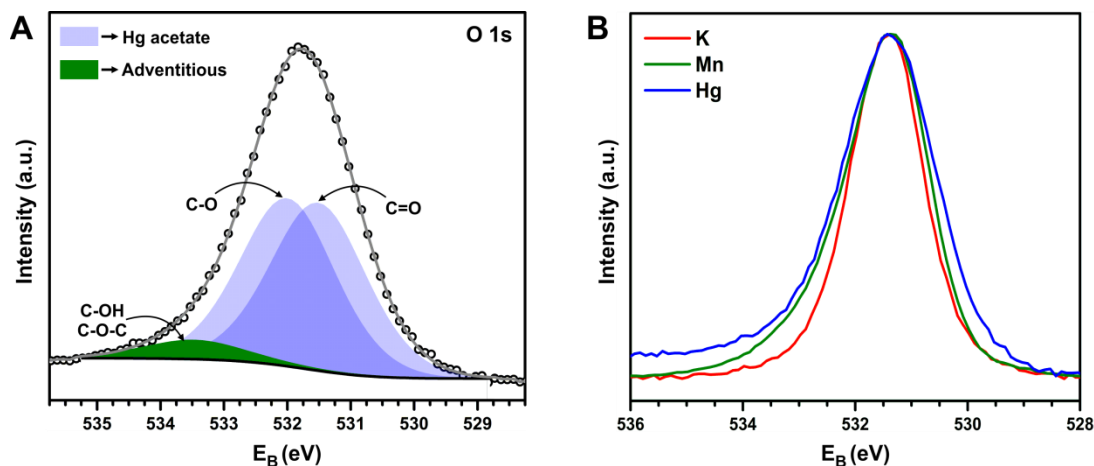

**Figure S4. A)** Curve fitting of the high-resolution O 1s spectrum for the Hg acetate considering two contributions from the acetate group; the energy difference is 0.5 eV and the FWHM are 1.8-1.9 eV. **B)** Comparison of the line-shape profiles for K, Mn, and Hg acetates; note the absence of distinct features in the Hg spectrum.

- *On the importance of shake-up satellites in the studied metal acetates*

Spectra from Figures S1 and S2 do not show any shake-up satellite structure from the acetate  $-\text{COO}$  group, mainly because the weak signals are obscured by the inelastic background. However, shake-up satellites can be detected indirectly as an imbalance in the stoichiometry of the compounds; in our case, such imbalance is reflected in an intensity ratio between the carbon atoms  $-\text{COO}/\text{CH}_3 < 1$ , typically between 1 and 0.8.<sup>1</sup> In order to estimate the signal intensity reduction in  $-\text{COO}$  relative to  $-\text{CH}_3$ , we analyzed the K acetate, which is expected to be the compound where the charge in the acetate ion is the most delocalized. For this endeavor, the high-resolution C 1s spectrum was fitted by fixing the area ratio  $-\text{COO}/\text{CH}_3$  in the range of 0.8 – 1.0; for each curve fit, the binding energies of the acetate peaks and the corresponding  $\chi^2$  values were recorded. The results are presented in Figure S4. First, the  $-\text{COO}$  binding energy (not shown), which is the most relevant C 1s signal for our work, suffered no variation as a function of the area ratio  $-\text{COO}/\text{CH}_3$ , but it remained constant at 288.34 eV. Second, note in the figure that the  $\text{CH}_3$  binding energy decreases only 0.07 eV as the stoichiometry departs from 1. Third, the goodness of the fit is practically constant from 1 to 0.9, but for stoichiometry less than 0.9 it rapidly falls off (increasing values of  $\chi^2$ ). By combining these results, we conclude that, as far as our primary goals are concerned, the intensity decay of the  $-\text{COO}$  group by shake up satellite is of minor importance and can be safely disregarded.

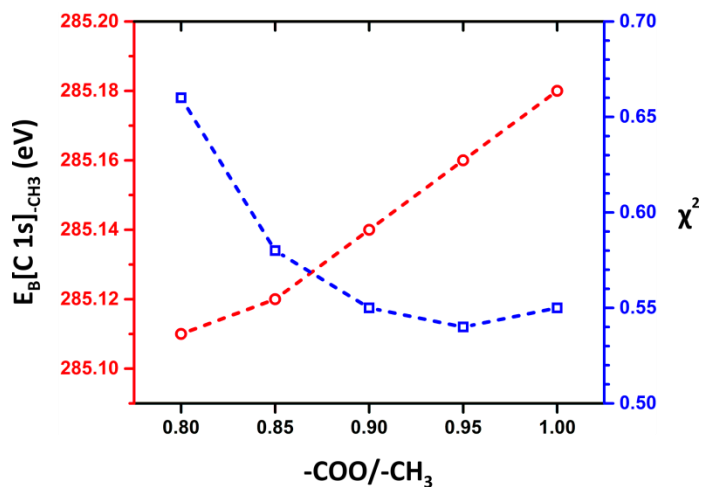

**Figure S5.** Variation of the binding energy for the C 1s of the K acetate methyl group and the goodness of the curve fitting process as a function of the area ratio  $-\text{COO}/-\text{CH}_3$ .

## B) Synthesis and characterization of $\text{Co}(\text{CH}_3\text{COO})_2(\text{C}_3\text{N}_2\text{H}_4)_2$ and $\text{Zn}(\text{CH}_3\text{COO})_2(\text{C}_3\text{N}_2\text{H}_4)_2$

These compounds were prepared by a synthetic rout described by Chen *et al.*<sup>2</sup>

**$\text{Co}(\text{CH}_3\text{COO})_2(\text{C}_3\text{N}_2\text{H}_4)_2$ .** 136 mg of imidazole ( $\text{C}_3\text{H}_4\text{N}_2$ ) were dissolved in 5 ml of methanol under stirring. In the same manner, 249 mg of cobalt(II) acetate tetrahydrate ( $\text{Co}(\text{CH}_3\text{CO}_2)_2 \cdot 4 \text{H}_2\text{O}$ ) were dissolved in 10 ml of methanol. Then, the imidazole solution was added dropwise to the cobalt acetate solution under stirring. A purple precipitate is formed after methanol evaporation.

**$\text{Zn}(\text{CH}_3\text{COO})_2(\text{C}_3\text{N}_2\text{H}_4)_2$ .** 220 mg of zinc acetate dihydrate ( $\text{Zn}(\text{CH}_3\text{CO}_2)_2 \cdot 2\text{H}_2\text{O}$ ) were dissolved in 15 ml of an aqueous ethanol solution in a 1:2 (v:v) ratio. Then, 136 mg of imidazole ( $\text{C}_3\text{H}_4\text{N}_2$ ) were added to the zinc acetate solution. Under stirring, a crystalline colorless precipitate was formed after solvent evaporation.

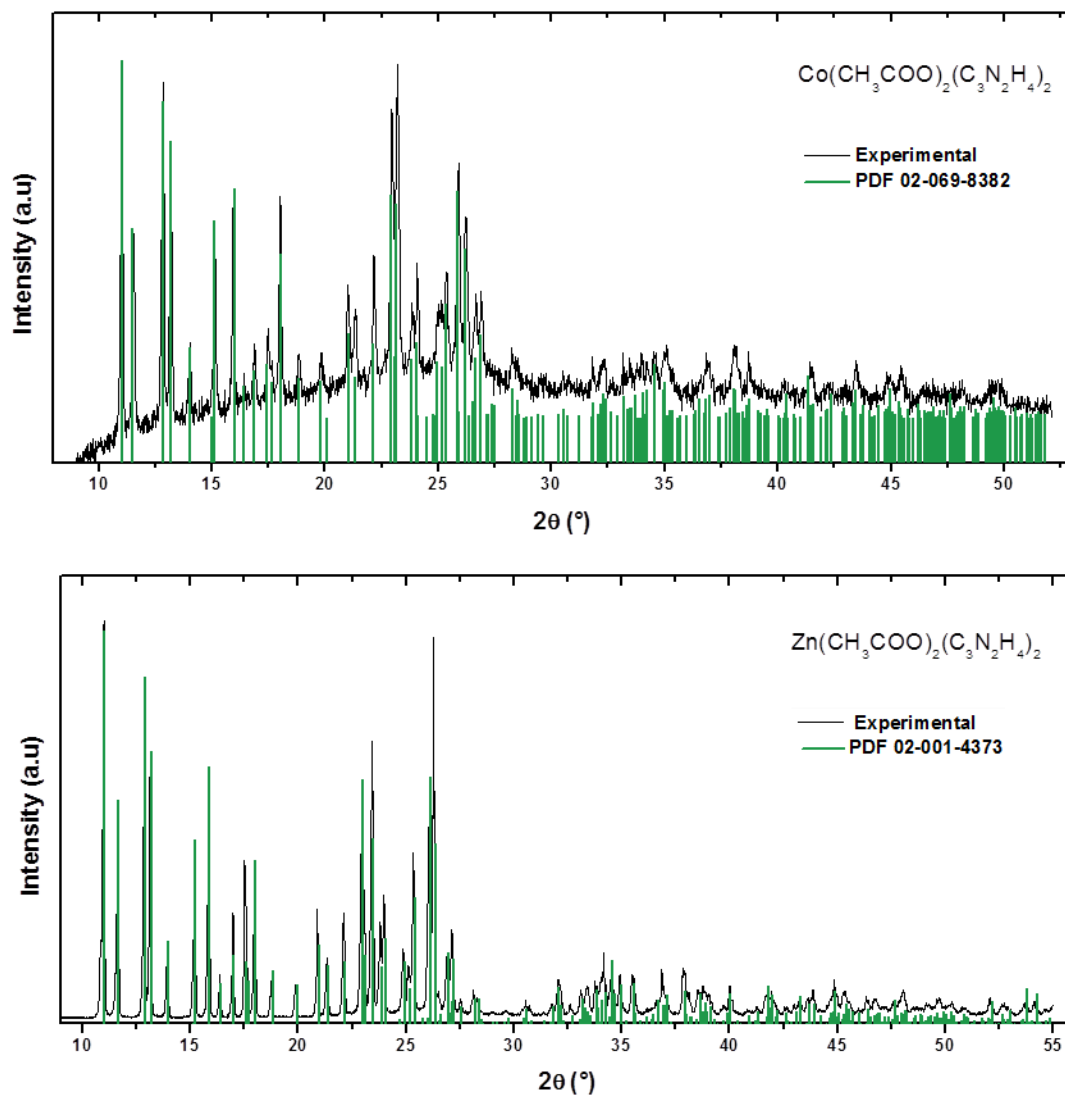

**Figure S6.** XRD powder patterns of  $\text{Co}(\text{CH}_3\text{COO})_2(\text{C}_3\text{N}_2\text{H}_4)_2$  (*top*) and  $\text{Zn}(\text{CH}_3\text{COO})_2(\text{C}_3\text{N}_2\text{H}_4)_2$  (*bottom*). The correspondent crystalline phase was identified through PDF-2 database.



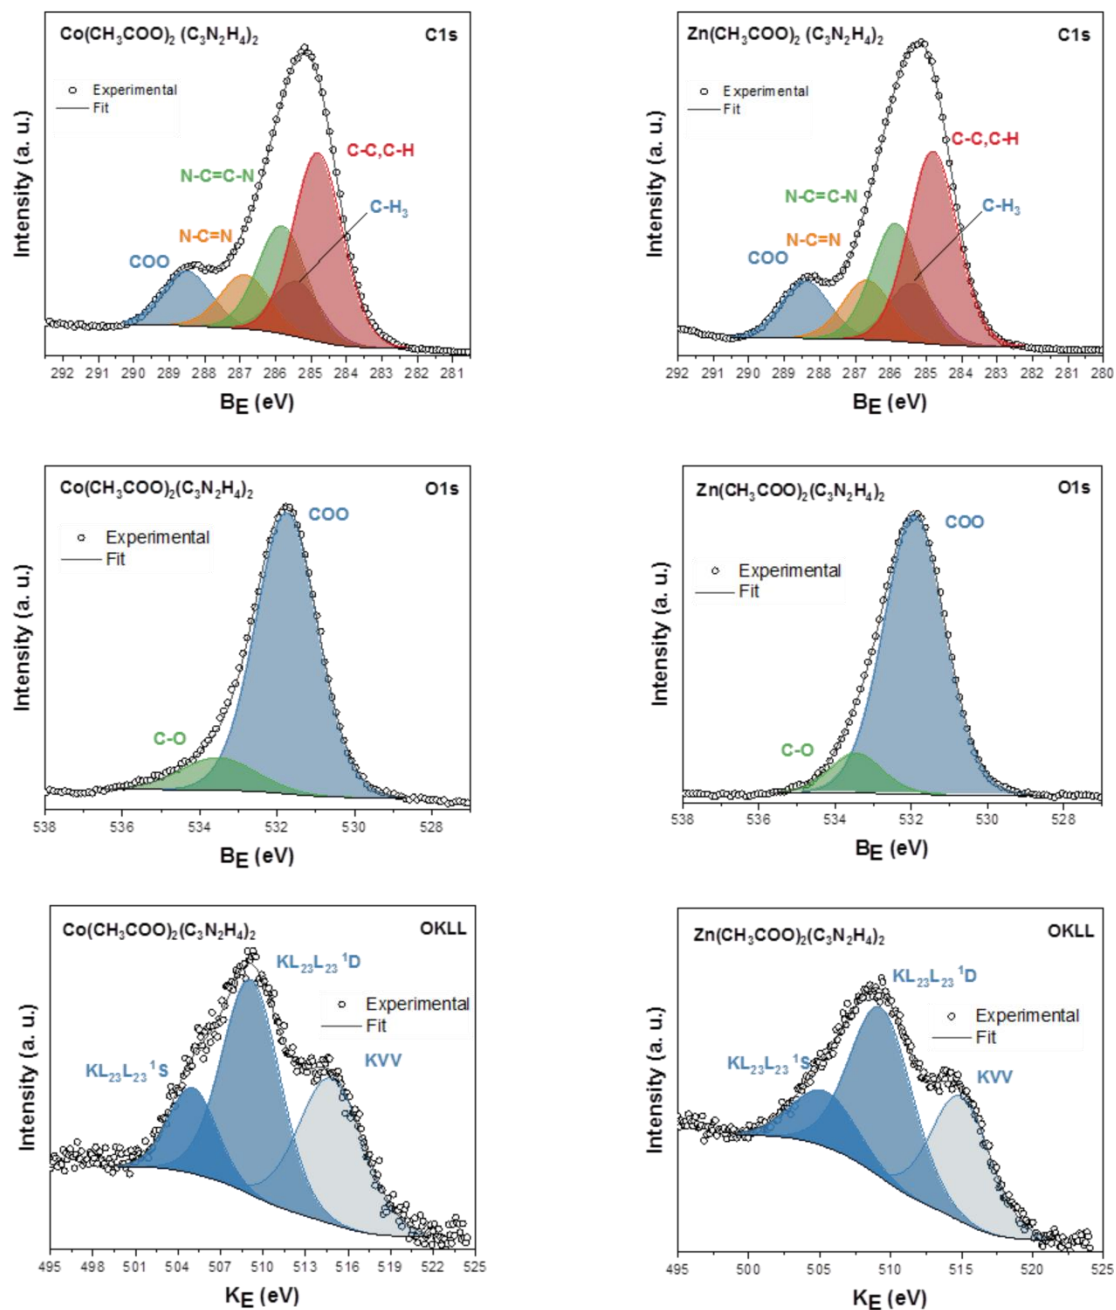

**Figure S7.** Curve fitting of the C 1s, O 1s and Auger O KLL spectra for  $\text{Co}(\text{CH}_3\text{COO})_2(\text{C}_3\text{N}_2\text{H}_4)_2$  and  $\text{Zn}(\text{CH}_3\text{COO})_2(\text{C}_3\text{N}_2\text{H}_4)_2$



### C) Supplementary data for the non-linear surface regression of Equation (6) [see Manuscript]

Table S2. Cation data used for the non-linear surface regression of Equation (6)

| Metal ion        | $r_M$ (Å) <sup>a)</sup> | $\chi_M$ <sup>b)</sup> | $\sigma_M$ <sup>c)</sup> |
|------------------|-------------------------|------------------------|--------------------------|
| K <sup>+</sup>   | 1.51                    | 0.91                   | 0.92                     |
| Na <sup>+</sup>  | 0.99                    | 0.98                   | 0.93                     |
| Li <sup>+</sup>  | 0.59                    | 1.02                   | 0.36                     |
| Mg <sup>2+</sup> | 0.89                    | 1.12                   | 0.87                     |
| Mn <sup>2+</sup> | 0.66                    | 1.44                   | 3.03                     |
| Fe <sup>2+</sup> | 0.63                    | 1.63                   | 3.09                     |
| Co <sup>2+</sup> | 0.58                    | 1.58                   | 2.96                     |
| Ni <sup>2+</sup> | 0.55                    | 1.5                    | 2.82                     |
| Cu <sup>2+</sup> | 0.57                    | 1.78                   | 2.89                     |
| Zn <sup>2+</sup> | 0.6                     | 1.62                   | 2.34                     |
| Cd <sup>2+</sup> | 0.78                    | 1.44                   | 3.04                     |
| Ag <sup>+</sup>  | 0.67                    | 1.52                   | 3.99                     |
| Hg <sup>2+</sup> | 0.96                    | 1.61                   | 4.25                     |
| Pb <sup>2+</sup> | 1.19                    | 1.25                   | 3.58                     |

a) From the reference of Shannon<sup>3</sup>

b) From reference of Matar *et al.*<sup>4</sup>

c) From reference of Misono *et al.*<sup>5</sup>

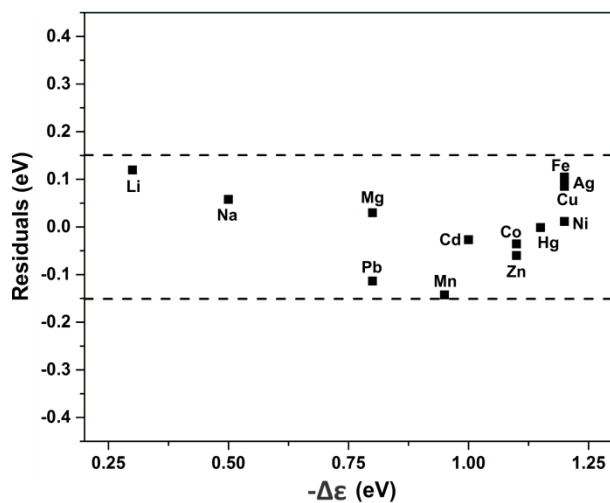

Figure S8. Residuals plot for the non-linear surface regression of Equation (6)

## References

1. G. Beamson and D. Briggs, *Journal of Chemical Education*, 1993, **70**, A25.
2. X.-M. Chen, B.-H. Ye, X.-C. Huang and Z.-T. Xu, *Journal of the Chemical Society, Dalton Transactions*, 1996, DOI: 10.1039/DT9960003465, 3465-3468.
3. R. D. Shannon, *Acta crystallographica section A: crystal physics, diffraction, theoretical and general crystallography*, 1976, **32**, 751-767.
4. S. F. Matar, G. Campet and M. A. Subramanian, *Progress in Solid State Chemistry*, 2011, **39**, 70-95.
5. M. Misono, E. i. Ochiai, Y. Saito and Y. Yoneda, *Journal of Inorganic and Nuclear Chemistry*, 1967, **29**, 2685-2691.
